# Supplementary material
Source: PubMed Central journal article supplement (PMC2796780)
Supplement: NIHMS140656-supplement-01.pdf [file NIHMS140656-supplement-01.pdf]

## List of original items, with glosses and translations

Daniele Panizza, Gennaro Chierchia, Charles Clifton Jr.

This is the English translation of the sentences used in Experiments 1 and 2. For each sentence, we translate in full only the DE version, while listing in italics the two noun phrases used to generate the three continuations. In Experiment 1 only sentences in the neutral condition were employed (e.g. with motorcycle instead of third car), whereas in Experiment 2 all variants are used (see Tables 1 and 2). Line breaks appearing in this list do not correspond to those we employed in Experiment 2.

### *Conditional Items*

- (1) Se Giovanni ha due macchine in garage, parcheggia una *terza macchina/motocicletta* nel  
If John has two cars in garage he parks a *third car/motorcycle* in the  
cortile esterno.  
courtyard.  
' If John has two cars in the garage he will park a third car/motorcycle in the courtyard '
- (2) Se Mario compra due computer nuovi, ha spazio in ufficio per un/una  
If Marius buys two computers new he has room in the office for a  
*terzo computer/stampante* vicino alla finestra.  
*third computer/printer* near the window.  
' If Marius buys two new computers he will have enough room for a third computer/printer near the  
window '
- (3) Se Marta beve due cocktail per aperitivo, prende un/una *terzo cocktail/coca cola* alla festa in  
If Marta drinks two cocktails as aperitif she takes a *third cocktail/coke* at the party in  
discoteca.  
disco  
' If Marta drinks two cocktails at dinner she will have a third cocktail/coke at the disco party '
- (4) Se il dottore effettua due visite a domicilio, fa una/un *terza visita/giro in ospedale* entro  
If the doctor makes two home visits he makes a *third visit/trip to the hospital* by  
fine giornata.  
end day  
' If the doctor makes two home visits he will make a third visit/trip to the hospital before night '
- (5) Se Eva compra tre libri in inglese, prende in prestito un *quarto libro/dizionario* dalla  
If Eva buys three books in English, she borrows a *fourth book/dictionary* from the  
biblioteca universitaria  
library university  
'If Eva buys three books written in English, she will borrow a fourth book/dictionary from the university  
library. '

- (6) Se Gloria porta in Spagna due paia di scarpe, compra un *terzo paio/paio di stivali* in una boutique di Madrid.  
 If Gloria brings to Spain two pairs of shoes, she buys a *third pair/pair of boots* in a boutique in Madrid.  
 'If Gloria brings to Spain two pairs of shoes she will buy a third pair/pair of boots in a boutique in Madrid.'
- (7) Se Gianna ha acquistato due vestiti firmati, comprerà un/una *terzo vestito/ gonna lunga* durante i saldi Natalizi.  
 If Gianna bought two dresses labeled she will buy a *third dress/long skirt* during the sales christmas.  
 'If Gianna bought two dresses made by a famous designer she will buy a third dress/long skirt during the Christmas sales.'
- (8) Se Massimiliano ha comprato due paia di jeans nuovi, prenderà un  
 if Maximilian bought two pairs of jeans new he will take a  
*terzo paio di jeans/giubbino di pelle* nel negozio di vestiti usati.  
*third pair of jeans/leather jacket* in the store of clothing used.  
 'If Maximilian bought two pairs of brand new jeans he will purchase a third pair/leather jacket at the used clothing store.'
- (9) Se Stefano ha vinto tre medaglie in atletica, conquisterà una/il  
 If Stephen won three medals in athletic events he will gain a/the  
*quarta medaglia/primato della scuola* nei giochi della gioventù'.  
*fourth medal/school record* in the games of the youth  
 'If Stephen won three medals in athletic events he will get a/the fourth medal/school record during the youth games.'
- (10) Se il dottorando ha pubblicato due articoli scientifici, scriverà un/la  
 If the doctoral student published two papers scientific he will write a/the  
*terzo articolo/tesi di dottorato* entro fine anno.  
*third paper/PhD dissertation* before end year.  
 'If the doctoral student published two scientific papers he will write a/the third paper/PhD dissertation before the end of the year.'
- (11) Se Giorgio ha superato quattro esami scritti, darà un/la *quinto esame/tesi di laurea*  
 If George passed four exams written, he will take a/the *fourth exam/undergrad dissertation*  
 entro la fine della sessione.  
 until the end of the session.  
 'If George passed three written exams he will take a fourth exam/undergrad dissertation until the end of the session.'
- (12) Se Piero ha ultimato la costruzione di due tavoli in legno, inizierà a costruire un/una  
 If Peter finished the construction of two tables wooden he will start to build a  
*terzo tavolo/libreria* entro fine sera.  
*third table/bookshelf* before end evening  
 'If Peter finished making two wooden tables he will start building a third table/bookshelf before the evening.'

*Quantified Items*

- (13) Nel mio quartiere ogni  
In my neighborhood every  
ragazza che ha due fratelli piu' grandi desidera un/a *terzo fratello/sorellina* di eta' inferiore.  
girl who has two brothers older wishes a *third brother/sister* of age lower.  
'In my part of town, every girl who has two older brothers wishes for a third younger brother/little sister.'
- (14) Tutti i giorni ogni amico di Anna che chiama una  
All the days every friend of Anna who calls one  
volta a casa viene invitato a chiamare una/sul *seconda volta/cellulare* nelle ore successive.  
time at home is invited to call a/on-the *second time/cellphone* in the hours next.  
'Every day, all friends of Anna's who call her once at home are invited to call a second time/her cell phone in the next hours.'
- (15) Nell'azienda di mio zio ogni operaio che lavora  
In the company of my uncle every employee who works  
per otto ore al giorno deve lavorare *nove ore/nei weekend* per un aumento in busta-paga.  
for eight hours a day must work *nine hours/the week-end* for a raise in pay-pocket.  
'In my uncle's company every employee who works eight hours a day must work for nine hours/the week-end to get a raise.'
- (16) Alla fiera del bestiame ogni espositore che ha due grandi  
At the market of the cattle every exhibitor who has two big  
allestimenti si aggiudica un *terzo allestimento/punto vendita* nel nuovo padiglione della fiera.  
stands gets himself a *third stand/point of sale* in the new pavilion of the market.  
'At the cattle market every exhibitor who has two big stands gets a third stand/point of sale in the new pavilion.'
- (17) Nel mio paese ogni famiglia che ha  
In my town every family that has  
due quintali di legna compra un/una *terzo quintale/stufa moderna* in vista del gelido inverno.  
two pounds of wood buys a *third pound/modern stove* waiting for the freezing winter.  
'In my town every family that has two pounds of wood buys a third pound/modern stove to cope with the freezing winter.'
- (18) Nel corso di storia ogni studente  
In the class of history every student  
che prende due voti alti riceve un *terzo voto/riconoscimento* entro la fine delle lezioni.  
who gets two evaluations high gets a *third evaluation/award* by the end of the lessons.  
'In the history class every student who gets two good evaluations gets a third evaluation/award by the end of the lessons.'
- (19) In quinta liceo ogni ragazzo che ha preso due  
In 5th grade high school every boy who got two  
note sul registro riceverà una/un *terza nota/ammonimento* dal preside della scuola.  
notes on the register will get a *third note/warning* from the headmaster of the school.  
'In 12th grade, every boy who got two warnings in the register will get a third warning/letter from the school headmaster.'

- (20) Nell'agenzia di Brescia ogni agente che ha concluso due contratti  
 In the branch of Brescia, every agent who made two agreements  
 d'affitto verrà esortato a chiudere un *terzo contatto/contratto di vendita* entro fine anno.  
 of rent will be urged to close a *third agreement/sale contract* by end year.  
 'In the Brescia branch, every agent who made two rent agreements will be urged to make a third agreement/sale contract by the end of the year.'
- (21) Nel torneo di calcetto ogni giocatore che ha fatto tre  
 In the tournament of soccer every player who made three  
 falli intenzionali commetterà un *quarto fallo/intervento pericoloso* prima della fine della partita.  
 fouls intentional will commit a *fourth foul/tackle hard* before the end of the match.  
 'In that soccer tournament every player who made three intentional fouls will commit a fourth foul/hard tackle before the match ends.'
- (22) Prima della gara ogni atleta che ha fatto tre allenamenti  
 Before the match every athlete who had three training sessions  
 a settimana farà un *quarto allenamento/lavoro defaticante* nell'ultimo mese di preparazione.  
 per week will do a *fourth training session/fitness training* in the last month of training.  
 'Before the match, every athlete who had three training sessions per week will need a fourth training session/check within the last month of training.'
- (23) Nell'ultimo mese ogni ragazzina che ha comprato  
 In the last month every young girl who bought  
 due abiti costosi comprerà un/una *terzo abito/borsetta* con i soldi della mamma.  
 two dresses expensive will buy a *third dress/handbag* with the money of the mum.  
 'Last month, every young girl who bought two expensive dresses will buy a third dress/handbag with her mum's money.'
- (24) A Parigi ogni chef che ha vinto due  
 In Paris every chef who won two  
 concorsi ufficiali concorrerà per un *terzo concorso/ammissione* all'accademia d'arte culinaria.  
 contests official will compete for a *third contest/admission* at the academy of art gastronomic.  
 'In Paris every chef who won two official official contests will compete for a third contest/admission in the gastronomy academy.'
